# Supplementary material for: APS8, a Polymeric Alkylpyridinium Salt Blocks α7 nAChR and Induces Apoptosis in Non-Small Cell Lung Carcinoma
Source: MDPI journal article supplement (doi:10.3390/md11072574), 2013-07-16
Supplement: s1 [file s1]

marinedrugs-11-02574-s001.mol
  corina  04141406053D 1   1.00000     0.00000 
CORINA 3.49 0023  12.04.2013
 32 33  0  0  0  0  0  0  0  0999 V2000
   -0.0167    1.3776    0.0096 C   0  0  0  0  0  0  0  0  0  0  0  0
    0.0021   -0.0041    0.0020 C   0  0  0  0  0  0  0  0  0  0  0  0
    1.1443   -0.6632   -0.0120 N   0  3  0  0  0  0  0  0  0  0  0  0
    2.3054   -0.0383   -0.0197 C   0  0  0  0  0  0  0  0  0  0  0  0
    2.3651    1.3426   -0.0133 C   0  0  0  0  0  0  0  0  0  0  0  0
    1.1850    2.0698    0.0019 C   0  0  0  0  0  0  0  0  0  0  0  0
    3.6964    2.0488   -0.0217 C   0  0  0  0  0  0  0  0  0  0  0  0
    1.1226   -2.1280   -0.0187 C   0  0  0  0  0  0  0  0  0  0  0  0
    0.9690   -8.7301   -5.8186 C   0  0  0  0  0  0  0  0  0  0  0  0
    0.9466  -10.2369   -5.8255 C   0  0  0  0  0  0  0  0  0  0  0  0
   -0.2591  -10.9210   -5.8172 C   0  0  0  0  0  0  0  0  0  0  0  0
   -0.2313  -12.3074   -5.8245 C   0  0  0  0  0  0  0  0  0  0  0  0
    0.9885  -12.9564   -5.8396 C   0  0  0  0  0  0  0  0  0  0  0  0
    2.1164  -12.2728   -5.8467 N   0  3  0  0  0  0  0  0  0  0  0  0
    2.1280  -10.9543   -5.8459 C   0  0  0  0  0  0  0  0  0  0  0  0
    3.3896  -12.9973   -5.8618 C   0  0  0  0  0  0  0  0  0  0  0  0
    3.8196  -13.2427   -7.3095 C   0  0  0  0  0  0  0  0  0  0  0  0
    5.1493  -13.9994   -7.3253 C   0  0  0  0  0  0  0  0  0  0  0  0
    5.5728  -14.2411   -8.7512 C   0  0  0  0  0  0  0  0  0  0  0  0
    6.3613  -13.3147   -9.4159 C   0  0  0  0  0  0  0  0  0  0  0  0
    6.7273  -13.5792  -10.7270 C   0  0  0  0  0  0  0  0  0  0  0  0
    6.2970  -14.7492  -11.3232 C   0  0  0  0  0  0  0  0  0  0  0  0
    5.5470  -15.6080  -10.6603 N   0  3  0  0  0  0  0  0  0  0  0  0
    5.1847  -15.3921   -9.4111 C   0  0  0  0  0  0  0  0  0  0  0  0
    5.1100  -16.8368  -11.3276 C   0  0  0  0  0  0  0  0  0  0  0  0
    1.1012   -2.6312   -1.4634 C   0  0  0  0  0  0  0  0  0  0  0  0
    1.0785   -4.1610   -1.4704 C   0  0  0  0  0  0  0  0  0  0  0  0
    1.0571   -4.6641   -2.9152 C   0  0  0  0  0  0  0  0  0  0  0  0
    1.0344   -6.1939   -2.9221 C   0  0  0  0  0  0  0  0  0  0  0  0
    1.0131   -6.6971   -4.3669 C   0  0  0  0  0  0  0  0  0  0  0  0
    0.9903   -8.2269   -4.3739 C   0  0  0  0  0  0  0  0  0  0  0  0
   11.7273    7.0698    5.0096 Br  0  5  0  0  0  0  0  0  0  0  0  0
  1  2  2  0      
  2  3  1  0      
  3  4  2  0      
  4  5  1  0      
  5  6  2  0      
  6  1  1  0      
  5  7  1  0      
  3  8  1  0      
  9 10  1  0      
 10 11  2  0      
 11 12  1  0      
 12 13  2  0      
 13 14  1  0      
 14 15  2  0      
 15 10  1  0      
 14 16  1  0      
 16 17  1  0      
 17 18  1  0      
 18 19  1  0      
 19 20  2  0      
 20 21  1  0      
 21 22  2  0      
 22 23  1  0      
 23 24  2  0      
 24 19  1  0      
 23 25  1  0      
 26 27  1  0      
 27 28  1  0      
 28 29  1  0      
 29 30  1  0      
 30 31  1  0      
  8 26  1  0      
  9 31  1  0      
M  CHG  4   3   1  14   1  23   1  32  -1
M  STY  1   1 SUP
M  SLB  1   1   1
M  SAL   1  6  26  27  28  29  30  31
M  SBL   1  2  32  33
M  SMT   1 (CH2)6
M  SBV   1 32   -8.0340    6.2699
M  SBV   1 33   -9.3299    7.4466
M  STY  1   2 SUP
M  SLB  1   2   2
M  SAL   2  1  32
M  SMT   2 (Br-)
M  STY  1   3 SRU
M  SLB  1   3   3
M  SCN  1   3 HT 
M  SAL   3  9  31   9  10  11  12  13  14  15   8
M  SBL   3  2  16   8
M  SMT   3 63
M  SDI   3  4    0.0553   -0.8250   -0.7697   -0.8250
M  SDI   3  4    2.0881    1.6500    2.9131    1.6500
M  END
$$$$
