# Supplementary material for: APS8, a Polymeric Alkylpyridinium Salt Blocks α7 nAChR and Induces Apoptosis in Non-Small Cell Lung Carcinoma
Source: MDPI journal article supplement (doi:10.3390/md11072574), 2013-07-16
Supplement: s2 [file s2]

marinedrugs-11-02574-s001.mol
  ChemDraw04141418042D

 32 33  0  0  0  0  0  0  0  0999 V2000
    1.7862    3.3000    0.0000 C   0  0  0  0  0  0  0  0  0  0  0  0
    1.7862    2.4750    0.0000 C   0  0  0  0  0  0  0  0  0  0  0  0
    2.5006    2.0625    0.0000 N   0  3  0  0  0  0  0  0  0  0  0  0
    3.2151    2.4750    0.0000 C   0  0  0  0  0  0  0  0  0  0  0  0
    3.2151    3.3000    0.0000 C   0  0  0  0  0  0  0  0  0  0  0  0
    2.5006    3.7125    0.0000 C   0  0  0  0  0  0  0  0  0  0  0  0
    3.9296    3.7125    0.0000 C   0  0  0  0  0  0  0  0  0  0  0  0
    2.5006    1.2375    0.0000 C   0  0  0  0  0  0  0  0  0  0  0  0
    1.0717    1.2375    0.0000 C   0  0  0  0  0  0  0  0  0  0  0  0
    0.3572    0.8250    0.0000 C   0  0  0  0  0  0  0  0  0  0  0  0
   -0.3572    1.2375    0.0000 C   0  0  0  0  0  0  0  0  0  0  0  0
   -1.0717    0.8250    0.0000 C   0  0  0  0  0  0  0  0  0  0  0  0
   -1.0717    0.0000    0.0000 C   0  0  0  0  0  0  0  0  0  0  0  0
   -0.3572   -0.4125    0.0000 N   0  3  0  0  0  0  0  0  0  0  0  0
    0.3572    0.0000    0.0000 C   0  0  0  0  0  0  0  0  0  0  0  0
   -0.3572   -1.2375    0.0000 C   0  0  0  0  0  0  0  0  0  0  0  0
   -1.0717   -1.6500    0.0000 C   0  0  0  0  0  0  0  0  0  0  0  0
   -1.7862   -1.2375    0.0000 C   0  0  0  0  0  0  0  0  0  0  0  0
   -2.5006   -1.6500    0.0000 C   0  0  0  0  0  0  0  0  0  0  0  0
   -3.2151   -1.2375    0.0000 C   0  0  0  0  0  0  0  0  0  0  0  0
   -3.9296   -1.6500    0.0000 C   0  0  0  0  0  0  0  0  0  0  0  0
   -3.9296   -2.4750    0.0000 C   0  0  0  0  0  0  0  0  0  0  0  0
   -3.2151   -2.8875    0.0000 N   0  3  0  0  0  0  0  0  0  0  0  0
   -2.5006   -2.4750    0.0000 C   0  0  0  0  0  0  0  0  0  0  0  0
   -3.2151   -3.7125    0.0000 C   0  0  0  0  0  0  0  0  0  0  0  0
    1.9783    0.7843    0.0000 C   0  0  0  0  0  0  0  0  0  0  0  0
    1.2978    0.7843    0.0000 C   0  0  0  0  0  0  0  0  0  0  0  0
    0.9577    1.3733    0.0000 C   0  0  0  0  0  0  0  0  0  0  0  0
    0.2756    1.3733    0.0000 C   0  0  0  0  0  0  0  0  0  0  0  0
   -0.0637    1.9611    0.0000 C   0  0  0  0  0  0  0  0  0  0  0  0
   -0.7465    1.9611    0.0000 C   0  0  0  0  0  0  0  0  0  0  0  0
    1.3928   -0.1822    0.0000 Br  0  5  0  0  0  0  0  0  0  0  0  0
  1  2  2  0      
  2  3  1  0      
  3  4  2  0      
  4  5  1  0      
  5  6  2  0      
  6  1  1  0      
  5  7  1  0      
  3  8  1  0      
  9 10  1  0      
 10 11  2  0      
 11 12  1  0      
 12 13  2  0      
 13 14  1  0      
 14 15  2  0      
 15 10  1  0      
 14 16  1  0      
 16 17  1  0      
 17 18  1  0      
 18 19  1  0      
 19 20  2  0      
 20 21  1  0      
 21 22  2  0      
 22 23  1  0      
 23 24  2  0      
 24 19  1  0      
 23 25  1  0      
 26 27  1  0      
 27 28  1  0      
 28 29  1  0      
 29 30  1  0      
 30 31  1  0      
  8 26  1  0      
  9 31  1  0      
M  CHG  4   3   1  14   1  23   1  32  -1
M  STY  1   1 SUP
M  SLB  1   1   1
M  SAL   1  6  26  27  28  29  30  31
M  SBL   1  2  32  33
M  SMT   1 (CH2)6
M  SBV   1 32   -8.0340    6.2699
M  SBV   1 33   -9.3299    7.4466
M  STY  1   2 SUP
M  SLB  1   2   2
M  SAL   2  1  32
M  SMT   2 (Br-)
M  STY  1   3 SRU
M  SLB  1   3   3
M  SCN  1   3 HT 
M  SAL   3  9  31   9  10  11  12  13  14  15   8
M  SBL   3  2  16   8
M  SMT   3 63
M  SDI   3  4    0.0553   -0.8250   -0.7697   -0.8250
M  SDI   3  4    2.0881    1.6500    2.9131    1.6500
M  END
